# Supplementary material for: EUNADICS-AV early warning system dedicated to supporting aviation in the case of a crisis from natural airborne hazards and radionuclide clouds
Source: Copernicus journal article supplement (doi:10.5194/nhess-21-3367-2021), 2021-11-10
Supplement: Supplementary file 1 [file nhess-21-3367-2021-supplement.zip]

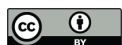

*Supplement of*

**EUNADICS-AV early warning system dedicated  
to supporting aviation in the case of a crisis from natural  
airborne hazards and radionuclide clouds**

**Hugues Brenot et al.**

*Correspondence to:* Hugues Brenot ([brenot@aeronomie.be](mailto:brenot@aeronomie.be))

- [nhess-21-3367-2021-supplement-title-page.pdf](#)
- [PLOTalertEWS\\_201905.gif](#)
- [PLOTalertEWS\\_201906.gif](#)
- [PLOTalertEWS\\_201907.gif](#)
- [PLOTalertEWS\\_201908.gif](#)

The copyright of individual parts of the supplement might differ from the article licence.
